# Supplementary material
Source: publisher figshare collection journal article supplement (https://gsajournals.figshare.com/ndownloader/files/14162807)
Supplement: Supplementary file 1 [file 14162807]

## Sheet: Strains
Strains used in this study
Strain	Species	Genotype	Comments
N2	Caenorhabditis elegans	wild isolate	Laboratory reference C. elegans strain
CEW1	Oscheius tipulae	wild isolate	Laboratory reference O. tipulae strain.
JU170	O. tipulae	wild isolate	Divergent O. tipulae strain used for mapping by sequencing
JU100	O. tipulae	Oti-smp-1(mf76)	Oti-smp-1 was known before as iov-2.Backcrossed 2x to CEW1, 1x to PS2428 unc(sy457).
JU108	O. tipulae	Oti-plx-1(mf78)	Oti-plx-1 was known before as iov-3.Backcrossed 2x to CEW1, 1x to PS2533 unc(sy474), 1x to CEW1.
JU148	O. tipulae	Oti-egl-20(sy451)	Oti-egl-20 was known before as dov-4.Backcrossed 3x to CEW1.
JU152	O. tipulae	Oti-egl-20(sy464)	Backcrossed 3x to CEW1.
JU162	O. tipulae	Oti-lin-3(mf86)	Oti-lin-3 was known before as iov-1.
JU432	O. tipulae	Oti-lin-3(mf86); him(sy527)	Oti-lin-3(mf86) with a recessive mutation producing a "high incidence of males" phenotype.
JU3175	O. tipulae	Oti-lin-3(mf113)	Oti-lin3 ACEL 12 bp deletion around the Caenorhabditis E-box (3 bp away each side), this work.
JU3238	O. tipulae	Oti-lin-3(mf114)	Oti-lin3 ACEL 1 bp insertion inside the Caenorhabditis E-box (CACCTG -> CACACTG), this work.
JU430	O. tipulae	Oti-lin-3(mf86); Oti-plx-1(mf78)
JU69	O. tipulae	Oti-plx-1(mf52)	Backcrossed 2x to CEW1, 1x to PS2428 (sy457), 2x to CEW1.
JU74	O. tipulae	Oti-mig-14(mf34)	Oti-mig-14 was known before as cov-5. Backcrossed 3x to CEW1, 1x to PS2617 dpy(sy518).
NW1615	C. elegans	plx-1(ev724) jcIs1[ajm-1::GFP + unc-29(+) + rol-6(su1006)] IV; him-5(e1490) V	Obtained from CGC.
NW1702	C. elegans	smp-1(ev715) I; jcIs1[ajm-1::GFP + unc-29(+) + rol-6(su1006)] IV; him-5(e1490) V	Obtained from CGC.
PS2373	O. tipulae	Oti-plx-1(sy447)	Backcrossed 5x to CEW1.
PS2458	O. tipulae	Oti-mom-5(sy465)	Oti-mom-5 was known before as cov-4.Backcrossed 1x to CEW1.
PS2565	O. tipulae	Oti-mom-5(sy493)	Backcrossed 1x to CEW1.
JU3360	O. tipulae	Oti-mom-5(sy493); Oti-lin-3(mf86)	Obtained from a cross between JU432 and PS2565, this work.
ST54	C. elegans	plx-1(nc37) IV; him-5(e1490) V	Obtained from CGC.
PD4666	C. elegans	ayIs6[hlh-8::GFP + dpy-20(+)]	Obtained from CGC.
NW1700	C. elegans	plx-2(ev773) II; him-5(e1490) V	Obtained from CGC
JU3431	C. elegans	plx-2(ev773) II; plx-1(ev724) jcIs1[ajm-1::GFP + unc-29(+) + rol-6(su1006)] IV; him-5(e1490) V	Obtained from a cross between NW1615 and NW1700, this work.
JU3434	C. elegans	plx-1(mf159ev724) jcIs1[ajm-1::GFP + unc-29(+) + rol-6(su1006)] IV; him-5(e1490) V	CRISPR on NW1615, this work
JU3435	C. elegans	plx-1(mf160ev724) jcIs1[ajm-1::GFP + unc-29(+) + rol-6(su1006)] IV; him-5(e1490) V	CRISPR on NW1615, this work
